## Prophylactic Intrathecal Morphine and Prevention of Post-Dural Puncture Headache: A Randomized Double-blind Trial: Erratum

In the article “Prophylactic Intrathecal Morphine and Prevention of Post-Dural Puncture Headache: A Randomized Double-blind Trial” published in the May 2020 issue, the terms *intrathecal morphine* and *intrathecal saline* are reversed in the Abstract and Results section.

The results section of the Abstract currently reads: “Epidural blood patch was administered to 10 of 27 (37%) of subjects in the intrathecal morphine and 11 of 21 (52%) of the intrathecal saline group (difference 15%; 95% CI, −18% to 48%).” The correct statement should read: “Epidural blood patch was administered to 11 of 21 (52%) of the intrathecal morphine group and 10 of 27 (37%) of subjects in the intrathecal saline and (difference 15%; 95% CI, −18% to 48%).” This statement is consistent with what is reported in Table 2.

The same error is found in the Results section. It currently reads: “Epidural blood patch was administered to 36% of subjects in the intrathecal morphine and 52% of the intrathecal saline group (difference, 16%; 95% CI, −17% to 49%).” The correct statement should be: “Epidural blood patch was administered to 52% of subjects in the intrathecal morphine and 37% of the intrathecal saline group (difference 15%; 95% CI, −18% to 48%).”

The authors regret the error. The online version and PDF of the article have been corrected.

DOI: 10.1097/ALN.0000000000003411

### Reference

Peralta FM, Wong CA, Higgins N, Toledo P, Jones MJ, McCarthy RJ. Prophylactic intrathecal morphine and prevention of post-dural puncture headache: A randomized double-blind trial. *ANESTHESIOLOGY* 2020; 132:1045–52. doi: 10.1097/ALN.0000000000003206.
